# Supplementary material
Source: PubMed Central journal article supplement (PMC11027464)
Supplement: 262_2020_2642_MOESM1_ESM.pdf [file 262_2020_2642_MOESM1_ESM.pdf]

**Supplementary Table 1 | List of 150 genes of panel sequencing**

|    | <b>Gene Symbol</b> |     | <b>Gene Symbol</b> |     | <b>Gene Symbol</b> |
|----|--------------------|-----|--------------------|-----|--------------------|
| 1  | ACVR2A             | 51  | FAT1               | 101 | NTRK1              |
| 2  | AKT1               | 52  | FBXW7              | 102 | NTRK2              |
| 3  | AKT2               | 53  | FGF19              | 103 | NTRK3              |
| 4  | ALK                | 54  | FGFR1              | 104 | PALB2              |
| 5  | APC                | 55  | FGFR2              | 105 | PDCD1LG2           |
| 6  | AR                 | 56  | FGFR3              | 106 | PDGFRA             |
| 7  | ARAF               | 57  | FLT1               | 107 | PDGFRB             |
| 8  | ARID1A             | 58  | FLT3               | 108 | PIK3CA             |
| 9  | ARID2              | 59  | FLT4               | 109 | PIK3R1             |
| 10 | ATM                | 60  | GATA3              | 110 | PREX2              |
| 11 | ATR                | 61  | GLI3               | 111 | PTCH1              |
| 12 | AXIN1              | 62  | GNA11              | 112 | PTEN               |
| 13 | BARD1              | 63  | GNAQ               | 113 | PTK2               |
| 14 | BCL2L11            | 64  | GNAS               | 114 | PTPN11             |
| 15 | BIRC5              | 65  | HNF1A              | 115 | RAD50              |
| 16 | BRAF               | 66  | HRAS               | 116 | RAF1               |
| 17 | BRCA1              | 67  | IDH1               | 117 | RB1                |
| 18 | BRCA2              | 68  | IDH2               | 118 | RBM10              |
| 19 | BRIP1              | 69  | IRS2               | 119 | RET                |
| 20 | C11orf30           | 70  | JAK2               | 120 | RICTOR             |
| 21 | CBL                | 71  | JAK3               | 121 | RIT1               |
| 22 | CCND1              | 72  | KDR                | 122 | RNF43              |
| 23 | CCND2              | 73  | KEAP1              | 123 | ROS1               |
| 24 | CCNE1              | 74  | KIT                | 124 | RUNX1T1            |
| 25 | CD274              | 75  | KMT2A              | 125 | SETD2              |
| 26 | CDH1               | 76  | KRAS               | 126 | SLIT2              |
| 27 | CDK12              | 77  | LRP1B              | 127 | SMAD2              |
| 28 | CDK4               | 78  | MAP2K1             | 128 | SMAD3              |
| 29 | CDK6               | 79  | MAP2K2             | 129 | SMAD4              |
| 30 | CDKN1B             | 80  | MAP2K4             | 130 | SMARCA2            |
| 31 | CDKN2A             | 81  | MAP3K1             | 131 | SMARCA4            |
| 32 | CHEK1              | 82  | MCL1               | 132 | SMO                |
| 33 | CHEK2              | 83  | MET                | 133 | SOX2               |
| 34 | CREBBP             | 84  | MLH1               | 134 | SPEN               |
| 35 | CRKL               | 85  | MRE11A             | 135 | SPTA1              |
| 36 | CTNNB1             | 86  | MSH2               | 136 | SRC                |
| 37 | CYP2C19            | 87  | MSH6               | 137 | STK11              |
| 38 | CYP2D6             | 88  | MTOR               | 138 | TBX3               |
| 39 | DDR2               | 89  | MYC                | 139 | TCF7L2             |
| 40 | DPYD               | 90  | MYCL               | 140 | TERT               |
| 41 | EGFR               | 91  | MYCN               | 141 | TGFBR2             |
| 42 | EP300              | 92  | NF1                | 142 | TP53               |
| 43 | EPHB1              | 93  | NFE2L2             | 143 | TPMT               |
| 44 | ERBB2              | 94  | NKX2-1             | 144 | TSC1               |
| 45 | ERBB3              | 95  | NOTCH1             | 145 | TSC2               |
| 46 | ERBB4              | 96  | NOTCH2             | 146 | UGT1A1             |
| 47 | ERRF1              | 97  | NOTCH3             | 147 | VEGFA              |
| 48 | ESR1               | 98  | NRAS               | 148 | VHL                |
| 49 | EZH2               | 99  | NRG1               | 149 | ZNF217             |
| 50 | FAM135B            | 100 | NRG3               | 150 | ZNF703             |
